# Supplementary material for: Sulforaphane alleviates psoriasis by enhancing antioxidant defense through KEAP1-NRF2 Pathway activation and attenuating inflammatory signaling
Source: PubMed Central journal article supplement (PMC10676357; doi:10.1038/s41419-023-06234-9), 2023-11-25

Figure 2b  
p-STAT3

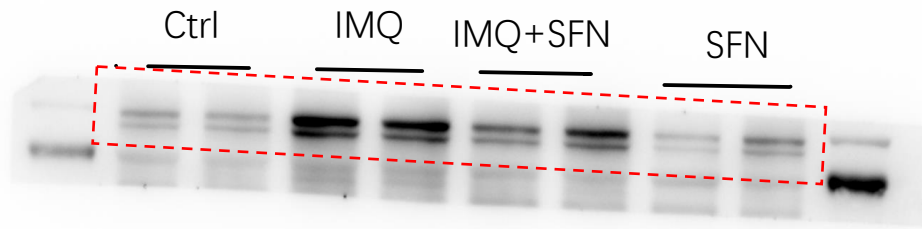

Figure 2b  
STAT3

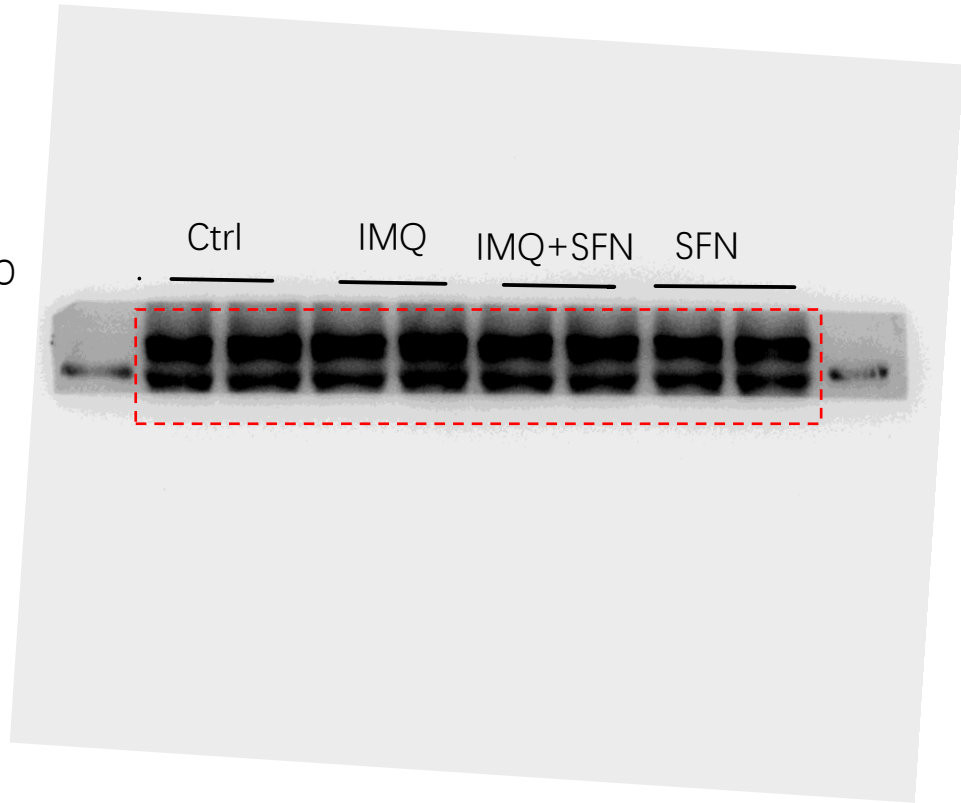

Figure 2b  
p-IkB

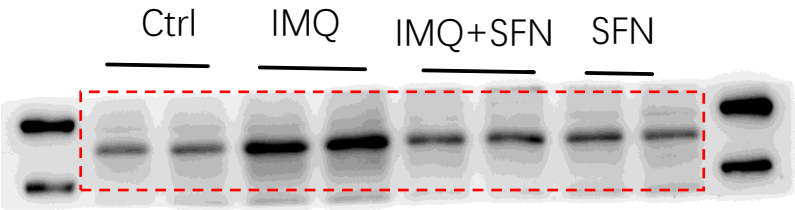

Figure 2b  
IκB

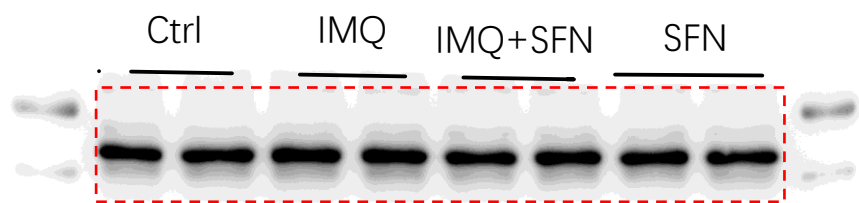

Figure 2b  
K16

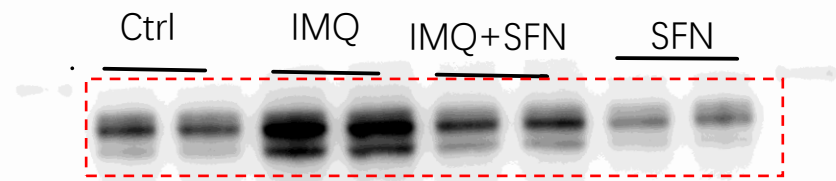

Figure 2b  
K17

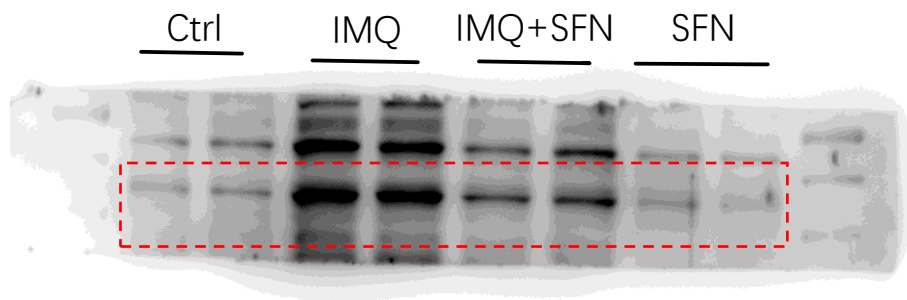

Figure 2b  
GAPDH

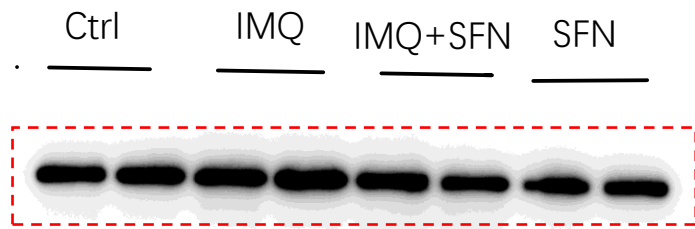

Figure 3a  
p-STAT3

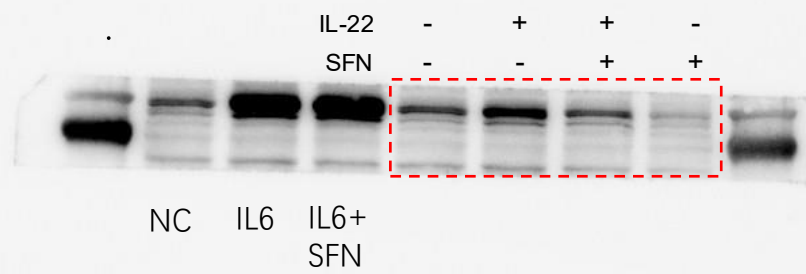



Figure 3a  
STAT3

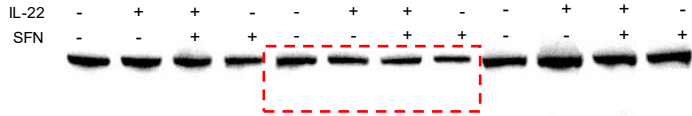

Figure 3a  
K16

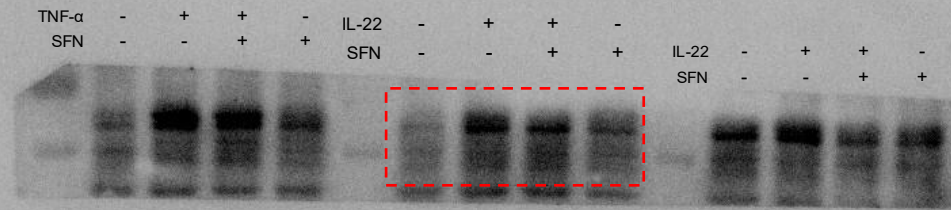

Figure 3a  
K17

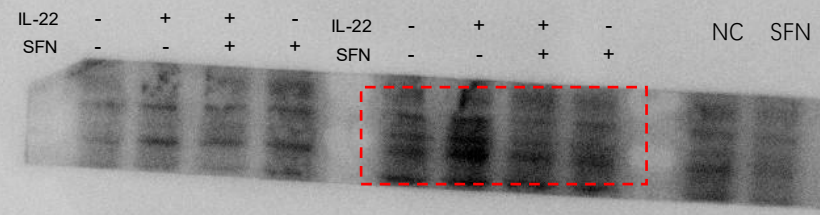

Figure 3a  
GAPDH

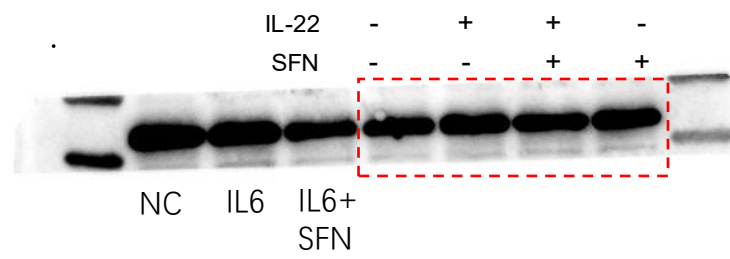

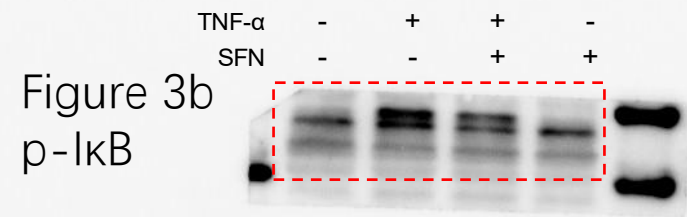

Figure 3b  
I $\kappa$ B

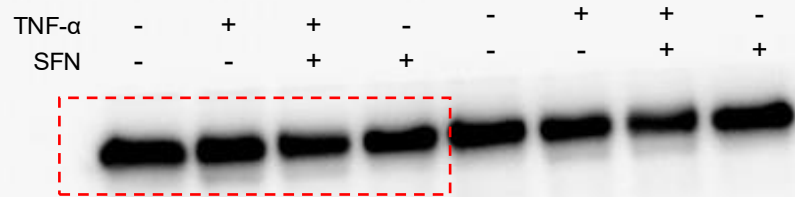

|               |   |   |   |   |               |   |   |   |   |               |   |   |   |   |
|---------------|---|---|---|---|---------------|---|---|---|---|---------------|---|---|---|---|
| TNF- $\alpha$ | - | + | + | - | TNF- $\alpha$ | - | + | + | - | TNF- $\alpha$ | - | + | + | - |
| SFN           | - | - | + | + | SFN           | - | - | + | + | SFN           | - | - | + | + |

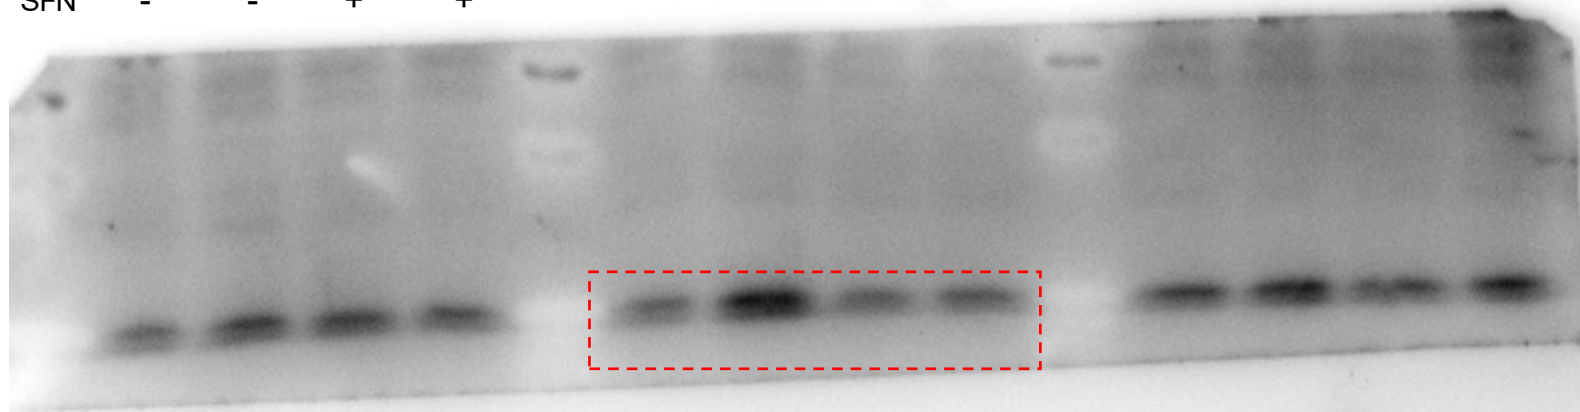

Figure 3b  
IL-1 $\beta$

Figure 3b  
K16

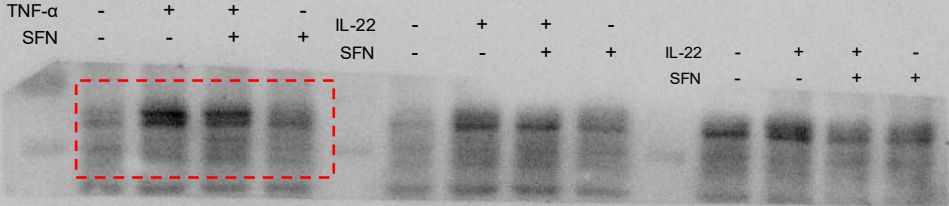



Figure 3b  
K17

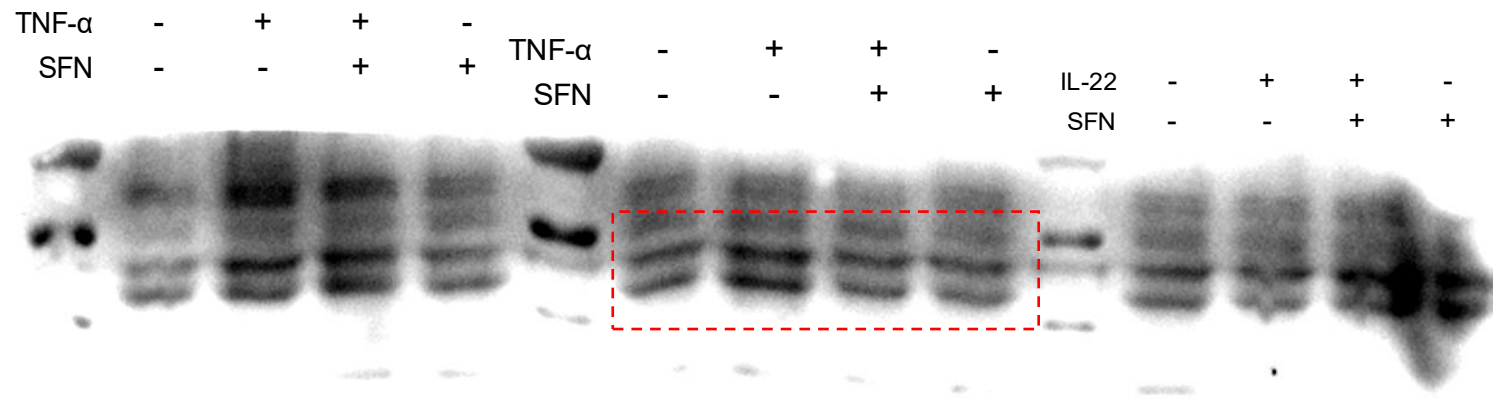

Figure 3b  
GAPDH

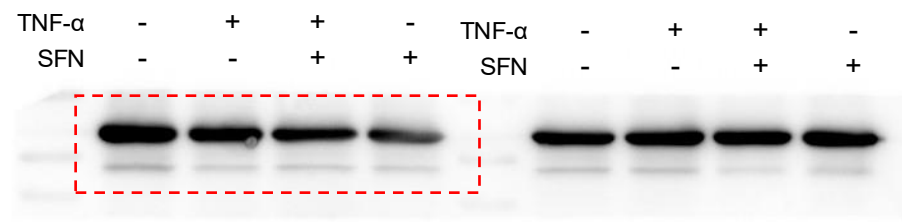

Figure 6a  
NRF2

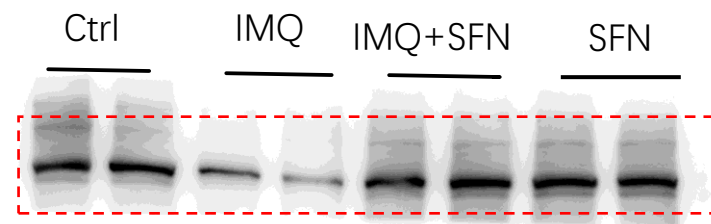

Figure 6a  
p-NRF2

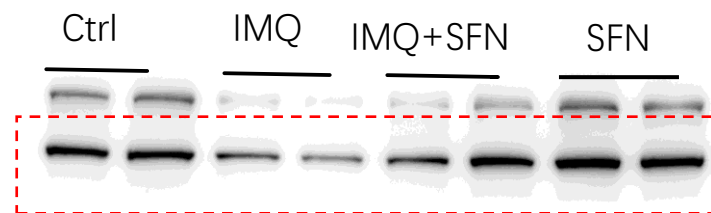

Figure 6a  
GAPDH

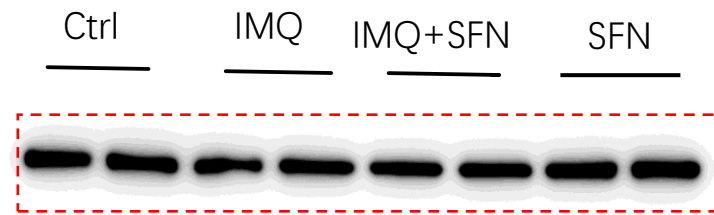

Figure 7a  
NRF2

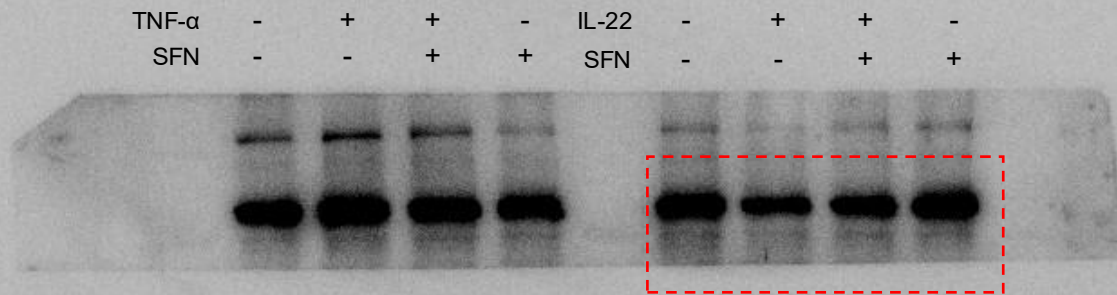

Figure 7a,7b  
p-NRF2

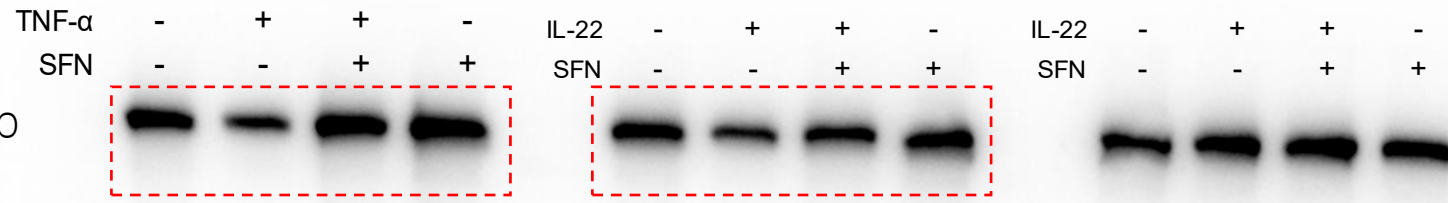

Figure 7b  
NRF2

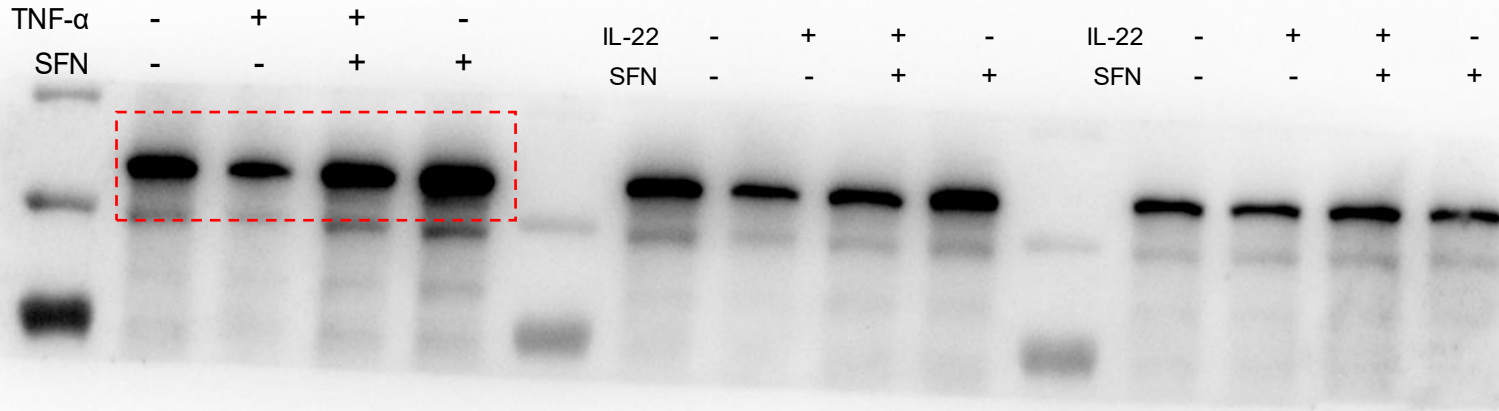



Figure 7a  
GAPDH

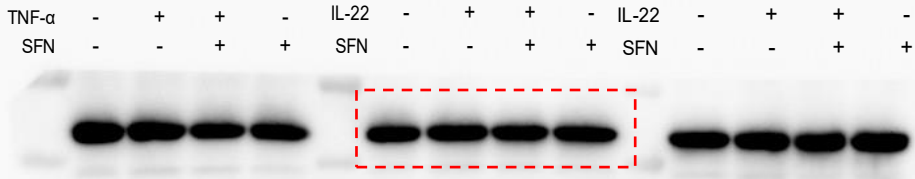

Figure 7b  
GAPDH

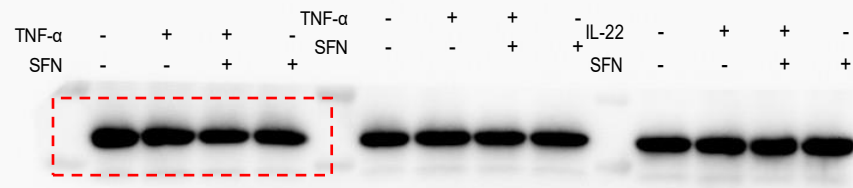

|       | sh-C |   |   | sh-NRF2-b |   |   |
|-------|------|---|---|-----------|---|---|
| IL-22 | -    | + | + | -         | + | + |
| SFN   | -    | - | + | -         | - | + |

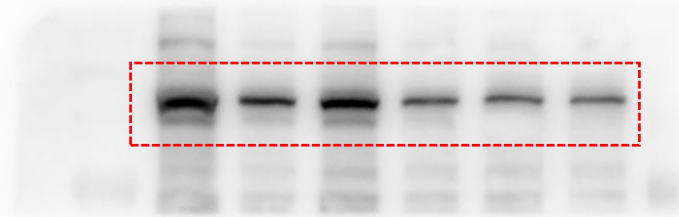

Figure 7e  
NRF2

Figure 7e  
NQO1

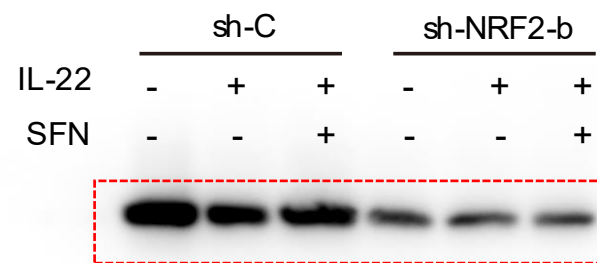

Figure 7e  
p-STAT3

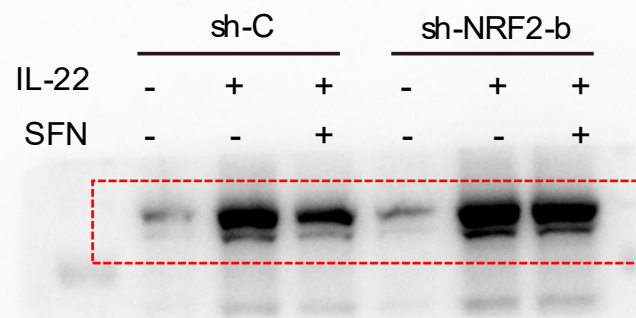

Figure 7e  
STAT3

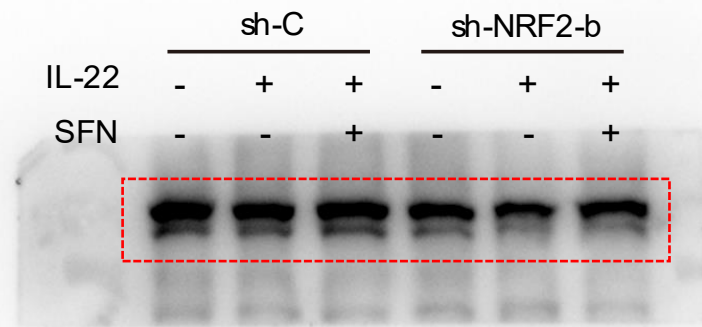

Figure 7e  
K16

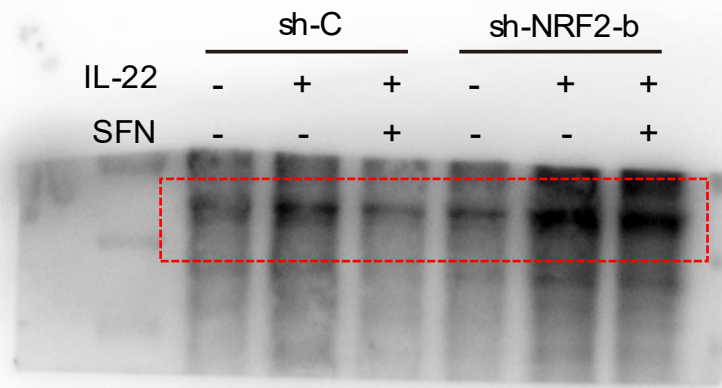

Figure 7e  
K17

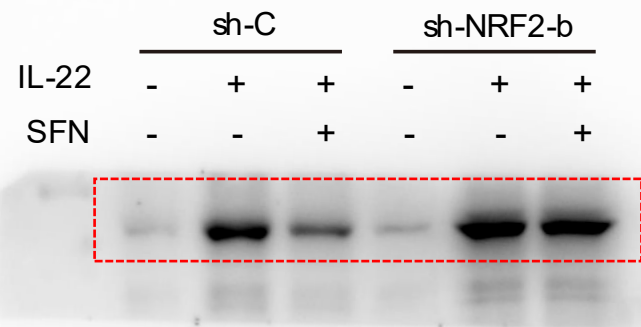



Figure 7e  
GAPDH

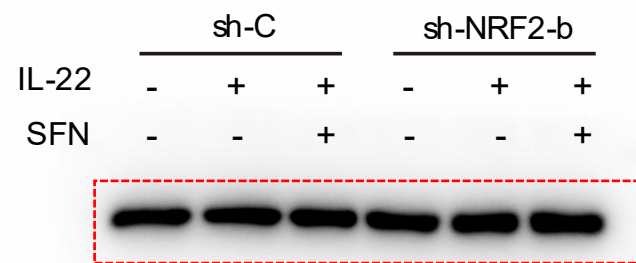

Figure 7f  
NRF2

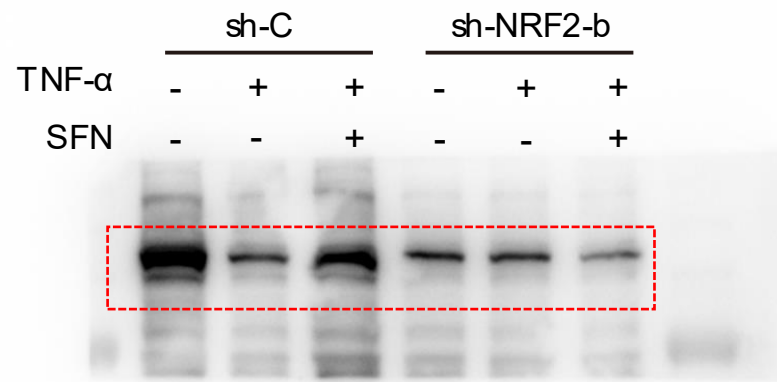

Figure 7f  
NQO1

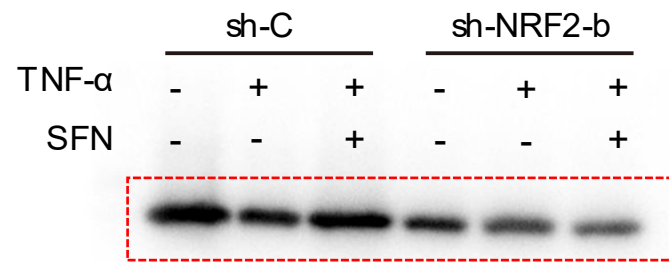

Figure 7f  
p-IkB

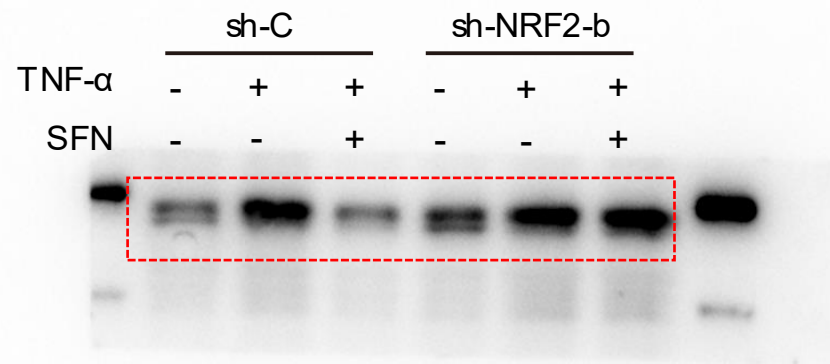

Figure 7f  
I $\kappa$ B

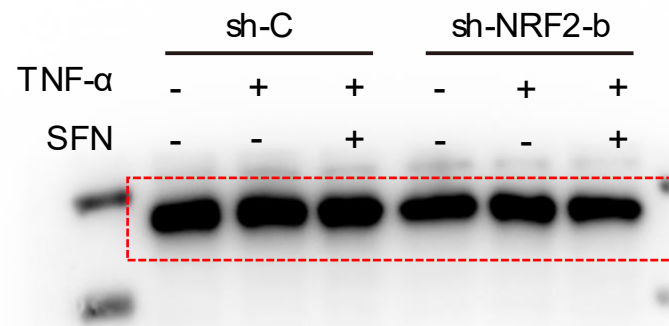

Figure 7f  
K16

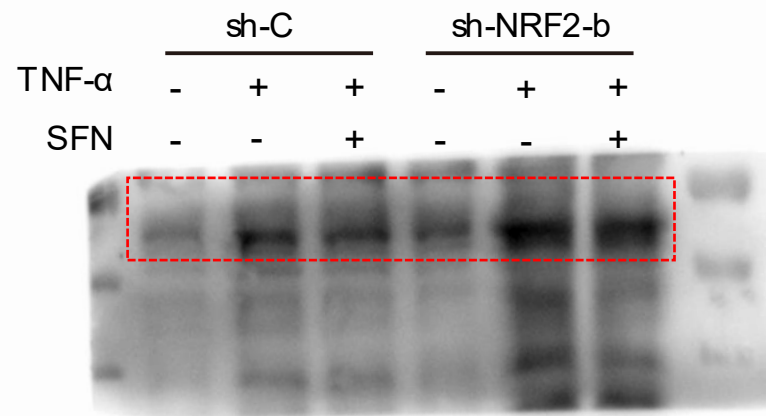

Figure 7f  
K17

|               | sh-C |   |   | sh-NRF2-b |   |   |
|---------------|------|---|---|-----------|---|---|
| TNF- $\alpha$ | -    | + | + | -         | + | + |
| SFN           | -    | - | + | -         | - | + |

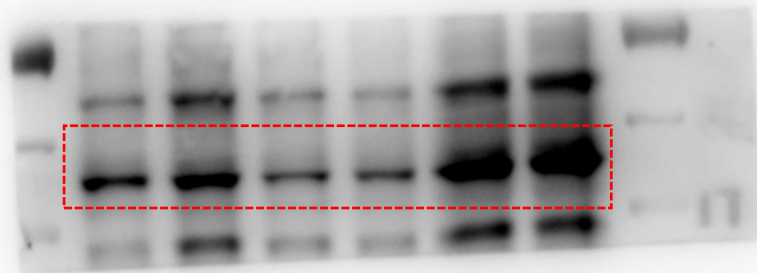

Figure 7f  
K16

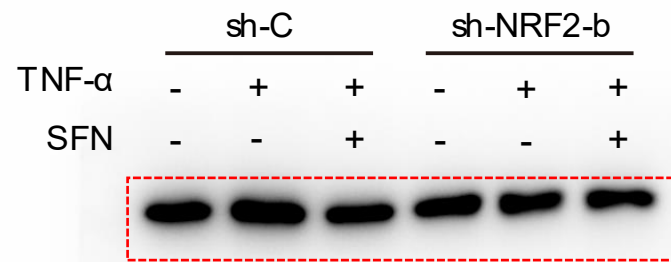



Figure 8c  
NRF2

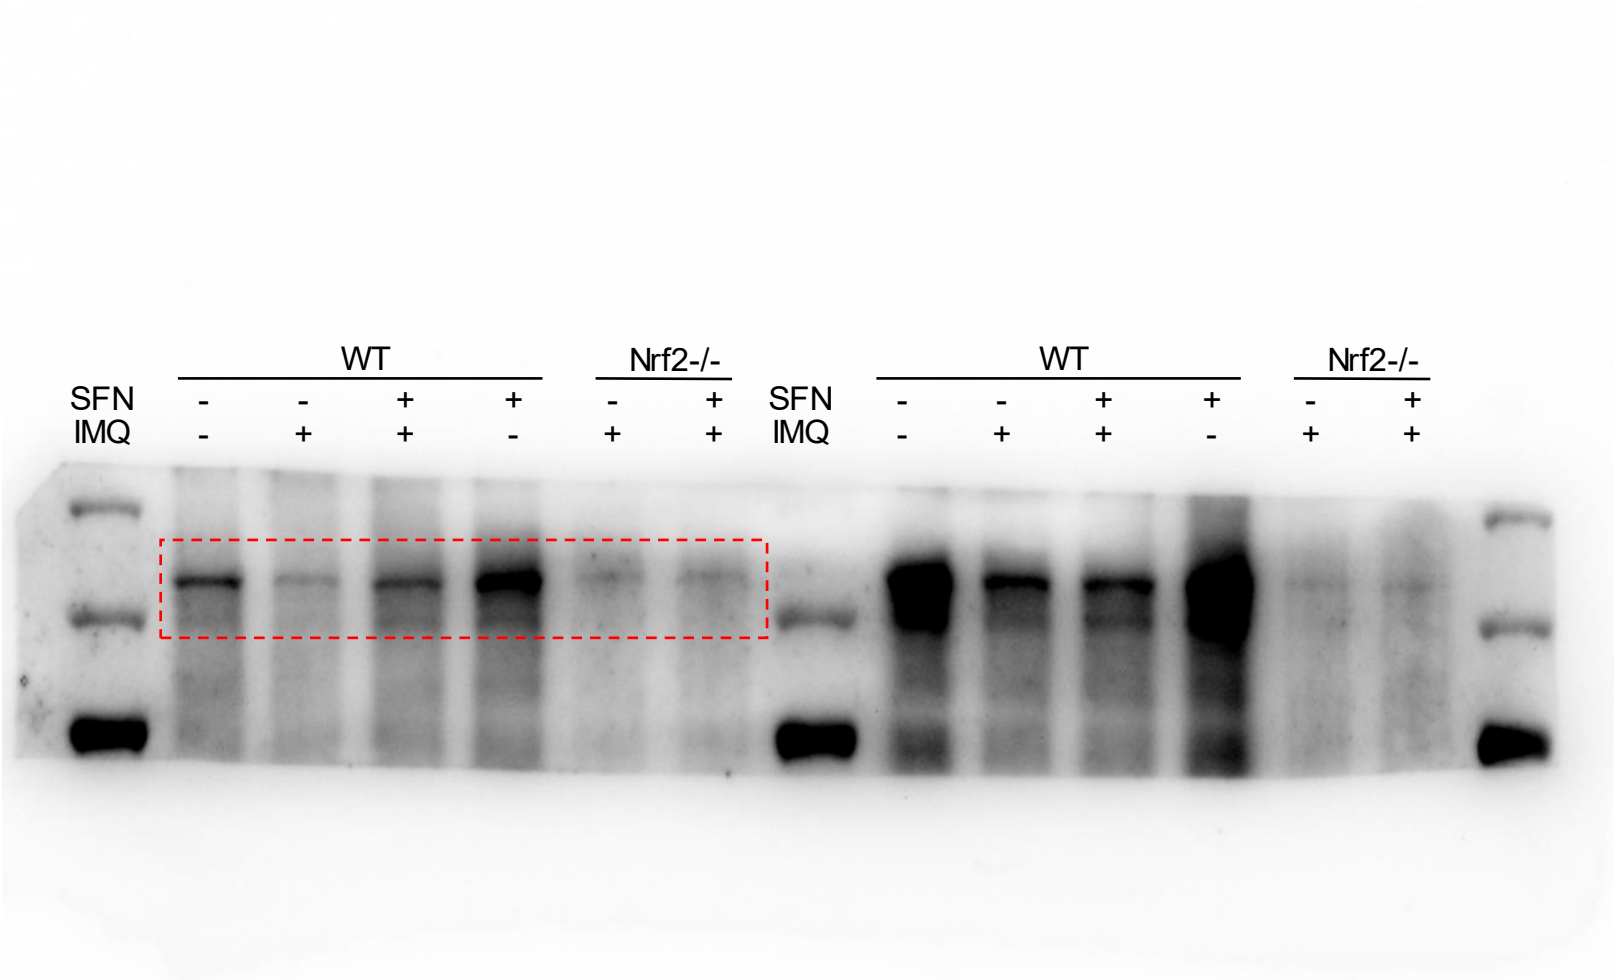

Figure 8c  
p-STAT3

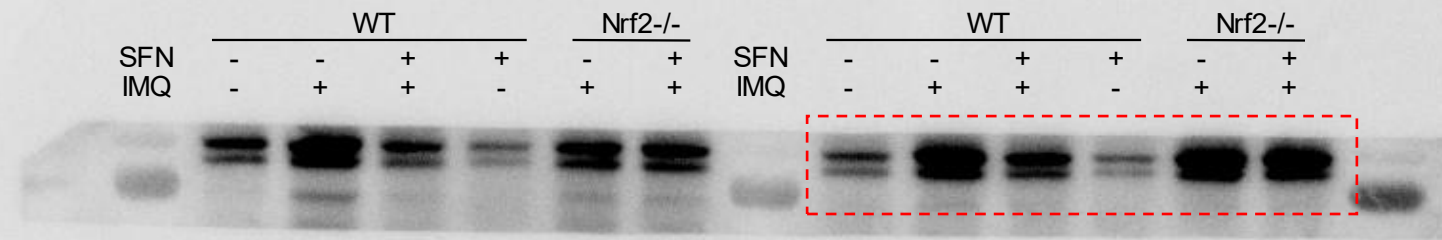

Figure 8c  
STAT3

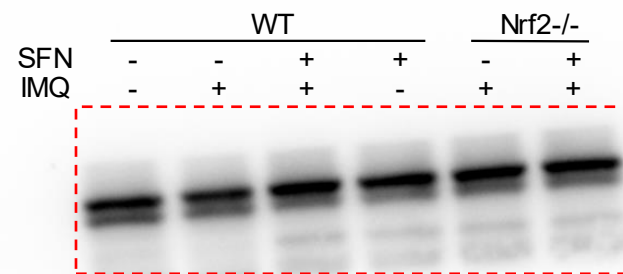

Figure 8c  
p-P65

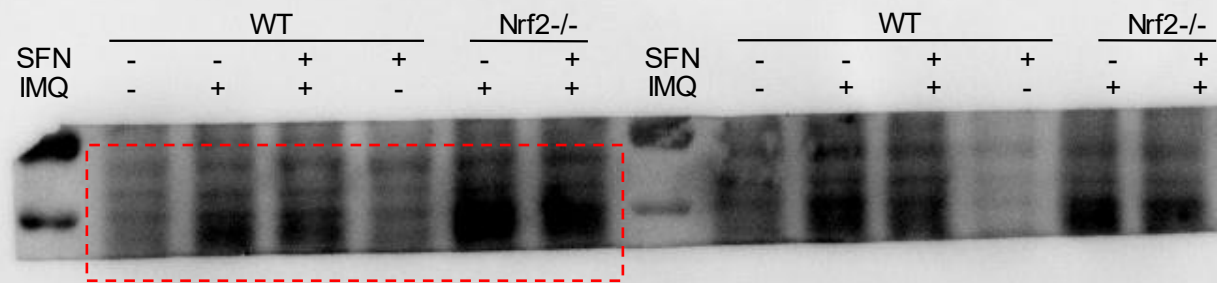

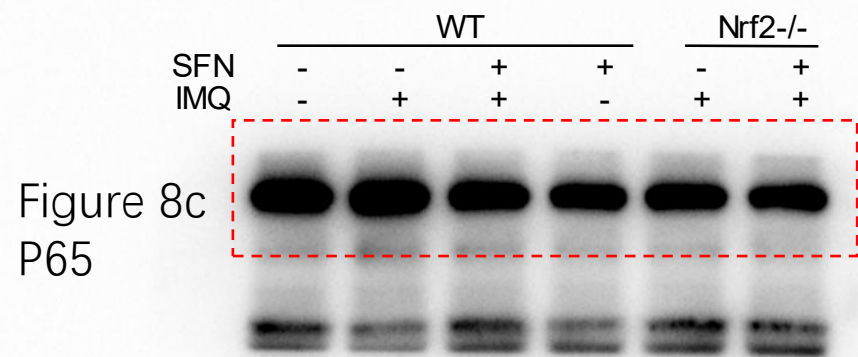

Figure 8c  
p-IkB

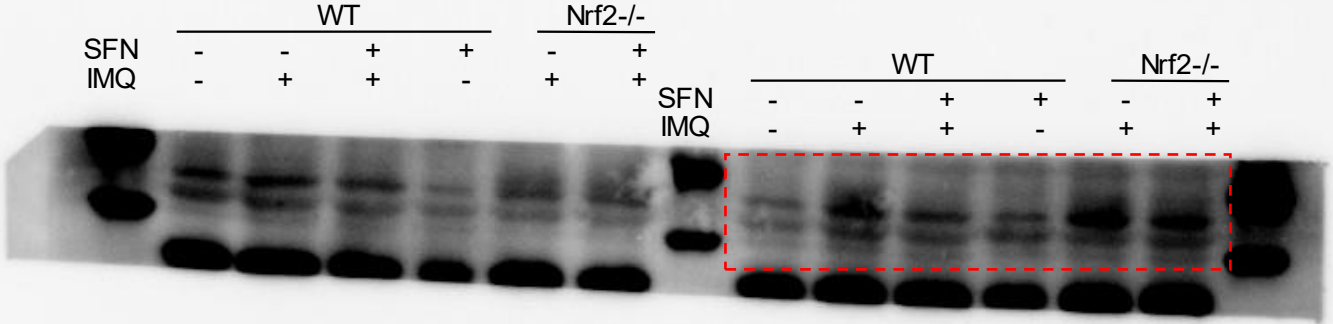

Figure 8c  
I $\kappa$ B

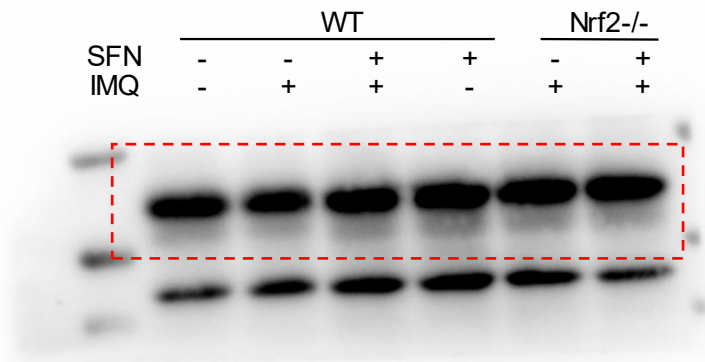

Figure 8c  
K16

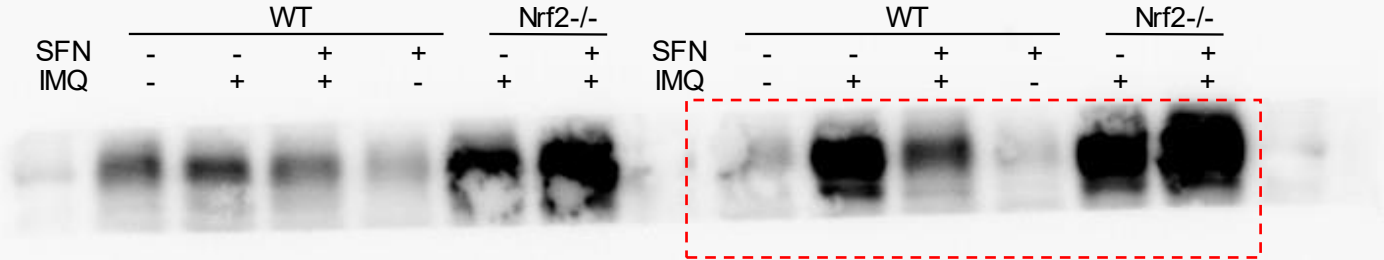



Figure 8c  
NQO1

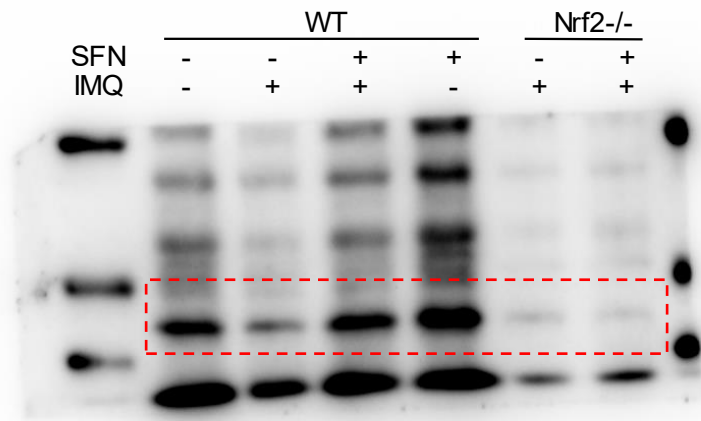

Figure 8c  
GAPDH

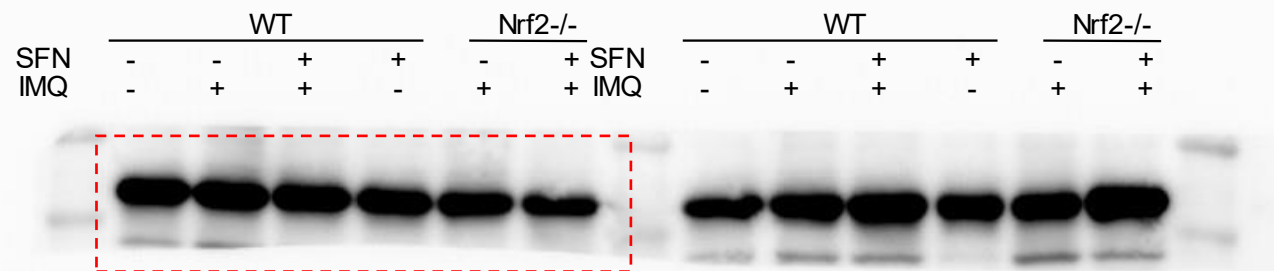

Supplement: 41419_2023_6234_MOESM2_ESM.pdf [file 41419_2023_6234_MOESM2_ESM.pdf]
